# Supplementary material
Source: Springer Nature journal article supplement (https://www.springermedizin.de/resource/supplementary/12903_2013_354_MOESM1_ESM.pdf/9516842)

**Socio-demographic factors**

Age  
Education  
Income  
Health Care Card status

**Psychosocial factors**

Perceived stress  
Sense of control  
Social support  
Subjective social standing

**Social cognitive factors**

Self-efficacy  
Fatalism

**Risk behaviours**

Not brushing previous day

**Poor self-rated oral health**

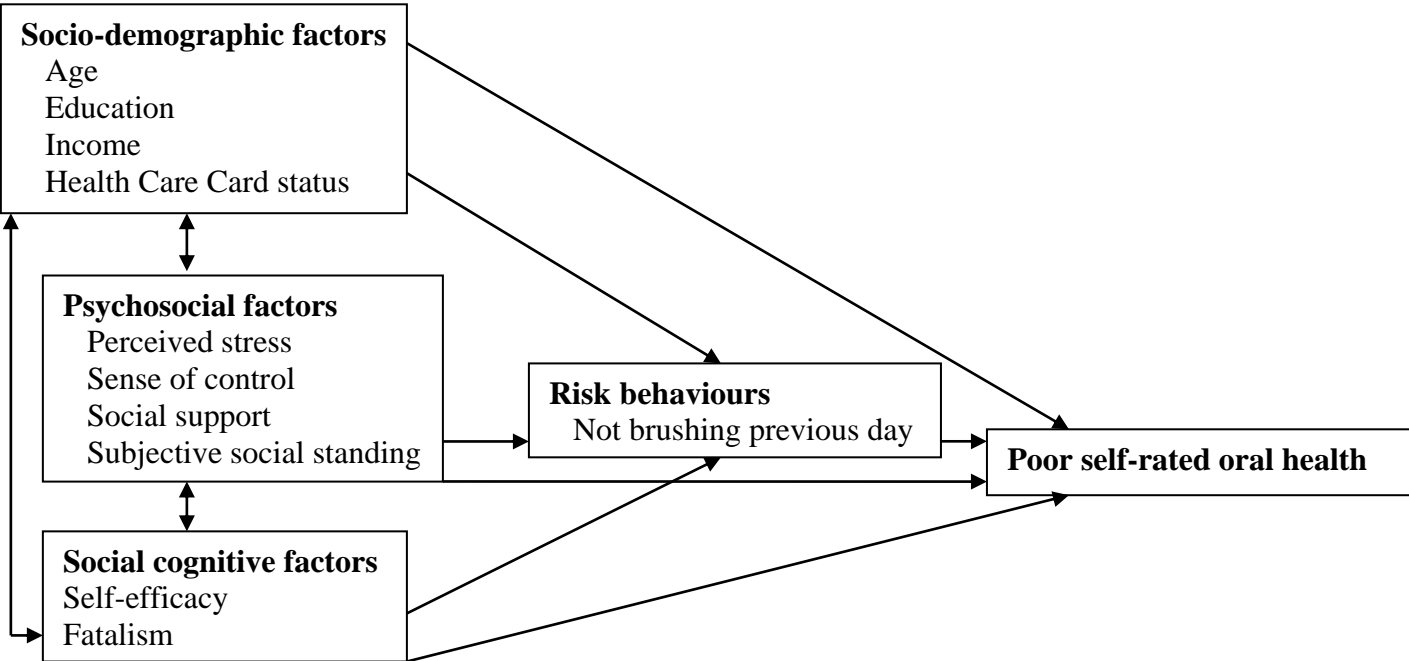

Supplement: MOESM1 [file 9516842]
